# Supplementary material
Source: publisher site journal article supplement (https://www.dovepress.com/article/388473)
Supplement: Supplementary file 1 [file get_supplementary_file.php]

**Appendix**

The table below shows Table 7 from the SECURE study (Calodney et al) and two randomized trials of lateral transiliac SI joint fusion (iMIA and INSITE).


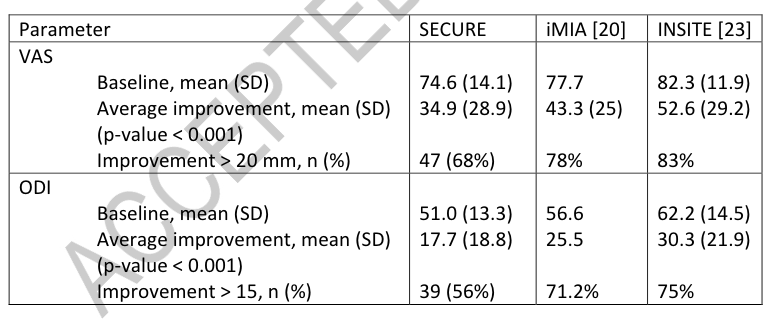


Data are summarized as:

|  | Improvement  in VAS pain  score | SD of  change score | N |
| --- | --- | --- | --- |
| iMIA and INSITE | 49.5* | 27* | 153 |
| SECURE | 34.9 | 28.9 | 69 |
|  |  |  |  |
|  | Improvement  in Oswestry Disability Index | SD of  change score | N |
| iFuse | 28.7* | 28* | 153 |
| DA | 17.7 | 18.8 | 69 |

*weighted average of iMIA and INSITE improvement and SD of change score

Using student’s t test: with degrees of freedom: , the t-value for the difference in mean pain score improvement is 3.55 (p=.0005). The t-value for the difference in mean Oswestry Disability Index improvement was 3.44 (p=.0007).
